# Supplementary material
Source: Springer Nature journal article supplement (https://www.springermedizin.de/resource/supplementary/12881_2010_706_MOESM2_ESM.pdf/9450924)

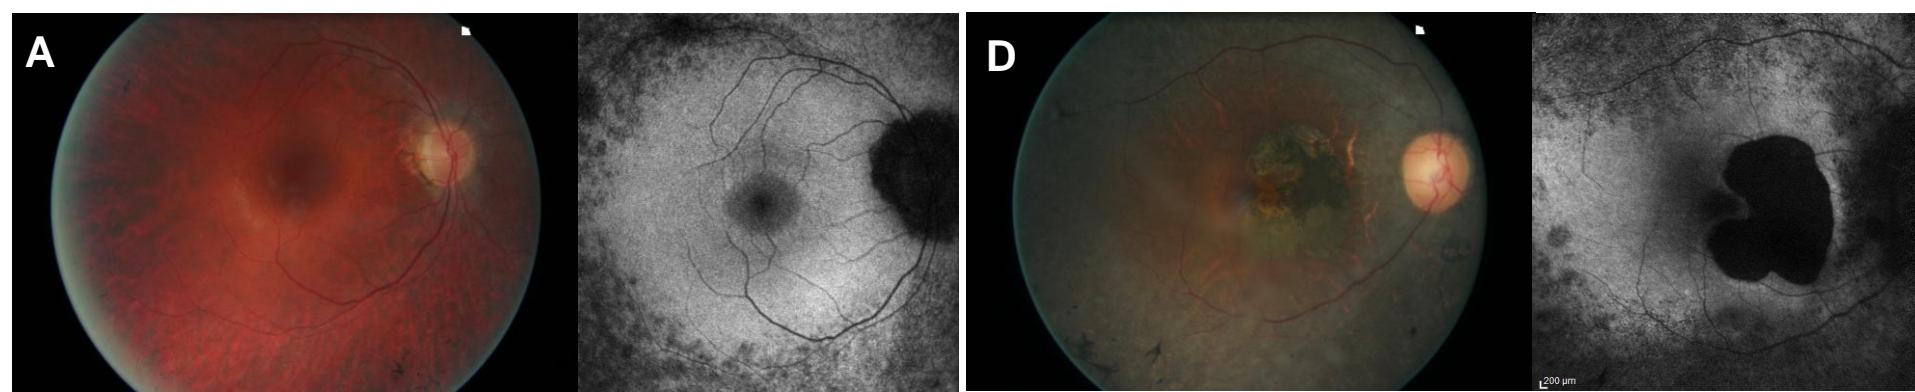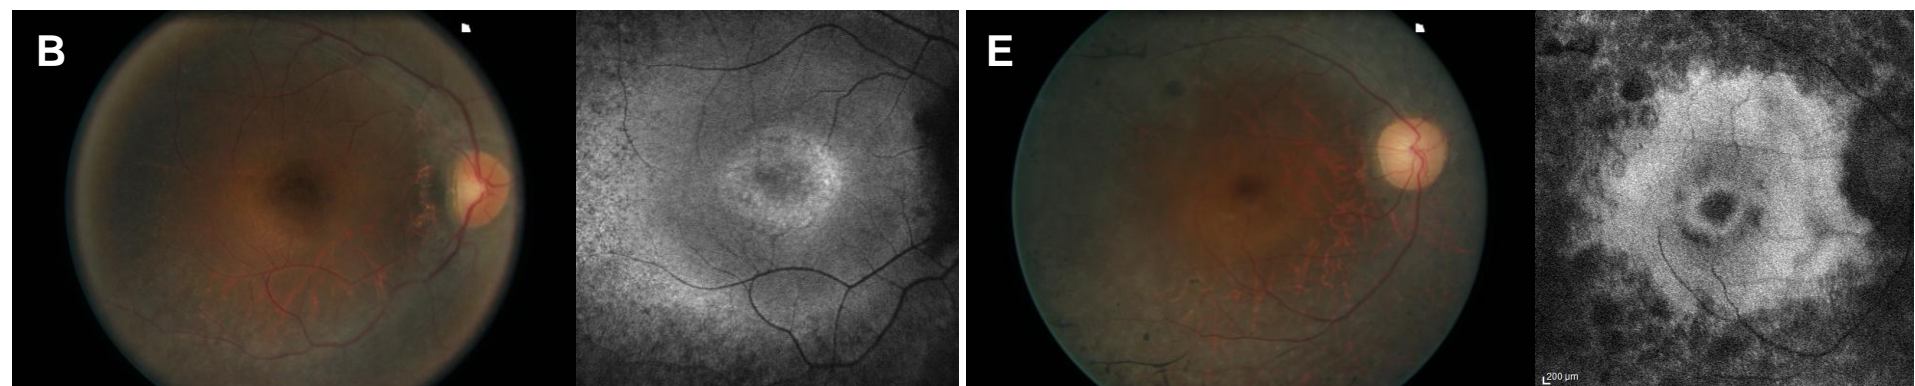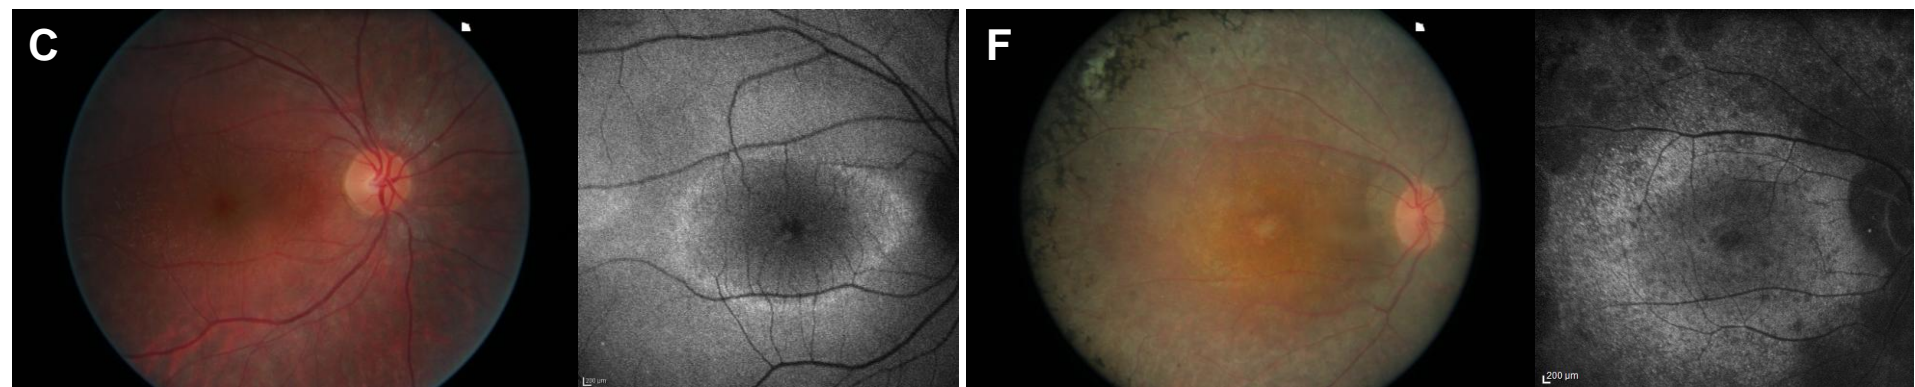

Supplement: MOESM2 [file 9450924]
